# Supplementary material
Source: PubMed Central journal article supplement (PMC1448992)
Supplement: aem_72_4_2449__1.pdf [file aem_72_4_2449__1.pdf]

**Table 2.** Gene expression ratios for the  $\Delta yceP$  biofilm relative to the wild-type biofilm in LB glu. Only genes consistently expressed more than 2-fold in both data sets are shown. AI-2, stress, and stationary phase signal (indole) related gene references are shown.

| Gene                                      | b-no         | fold change #1 | fold change #2 | Product                                          | AI-2 | Stress | indole |
|-------------------------------------------|--------------|----------------|----------------|--------------------------------------------------|------|--------|--------|
| <b>Information storage and processing</b> |              |                |                |                                                  |      |        |        |
| <b>Translation</b>                        |              |                |                |                                                  |      |        |        |
| <i>aspV</i>                               | <i>b0216</i> | -3.48          | -2.64          | tRNA <sup>asp</sup> V                            |      |        |        |
| <i>leuS</i>                               | <i>b0642</i> | -2.30          | -2.30          | leucine tRNA synthetase                          |      |        |        |
| <i>rpsA</i>                               | <i>b0911</i> | -2.14          | -2.83          | 30S ribosomal subunit protein S1                 |      |        |        |
| <i>rnpB</i>                               | <i>b3123</i> | -2.64          | -3.73          | RnpB RNA, catalytic subunit of RNase P           |      |        |        |
| <i>metY</i>                               | <i>b3171</i> | -2.30          | -3.25          | tRNA <sup>met</sup> Y                            |      |        |        |
| <i>rplU</i>                               | <i>b3186</i> | -4.29          | -2.46          | 50S ribosomal subunit protein L21                |      |        |        |
| <i>rplM</i>                               | <i>b3231</i> | -2.46          | -2.64          | 50S ribosomal subunit protein L13                |      |        |        |
| <i>thrV</i>                               | <i>b3273</i> | -2.30          | -2.14          | tRNA <sup>thr</sup> V                            |      |        |        |
| <i>alaU</i>                               | <i>b3276</i> | -2.30          | -2.83          | tRNA <sup>ala</sup> U                            |      |        |        |
| <i>rplQ</i>                               | <i>b3294</i> | -3.03          | -2.83          | 50S ribosomal subunit protein L17                |      |        |        |
| <i>rpsD</i>                               | <i>b3296</i> | -3.73          | -2.64          | 30S ribosomal subunit protein S4                 |      |        |        |
| <i>rpsK</i>                               | <i>b3297</i> | -3.03          | -2.64          | 30S ribosomal subunit protein S11                | (7)  |        |        |
| <i>rpsM</i>                               | <i>b3298</i> | -2.83          | -3.03          | 30S ribosomal subunit protein S13                |      |        |        |
| <i>rpmJ</i>                               | <i>b3299</i> | -3.48          | -3.48          | 50S ribosomal subunit protein L36                |      |        |        |
| <i>rplO</i>                               | <i>b3301</i> | -3.48          | -3.48          | 50S ribosomal subunit protein L15                |      |        |        |
| <i>rpmD</i>                               | <i>b3302</i> | -3.03          | -3.48          | 50S ribosomal subunit protein L30                |      |        |        |
| <i>rpsE</i>                               | <i>b3303</i> | -3.25          | -2.46          | 30S ribosomal subunit protein S5                 |      |        |        |
| <i>rplR</i>                               | <i>b3304</i> | -3.03          | -2.83          | 50S ribosomal subunit protein L18                | (7)  |        |        |
| <i>rplF</i>                               | <i>b3305</i> | -2.64          | -2.83          | 50S ribosomal subunit protein L6                 |      |        |        |
| <i>rpsH</i>                               | <i>b3306</i> | -2.30          | -3.03          | 30S ribosomal subunit protein S8, and regulator  |      |        |        |
| <i>rpsN</i>                               | <i>b3307</i> | -2.30          | -3.25          | 30S ribosomal subunit protein S14                |      |        |        |
| <i>rplX</i>                               | <i>b3309</i> | -2.46          | -3.03          | 50S ribosomal subunit protein L24                | (7)  |        |        |
| <i>rplN</i>                               | <i>b3310</i> | -2.14          | -3.03          | 50S ribosomal subunit protein L14                | (7)  |        |        |
| <i>rpmC</i>                               | <i>b3312</i> | -3.25          | -2.30          | 50S ribosomal subunit protein L29                |      |        |        |
| <i>tufA</i>                               | <i>b3339</i> | -2.14          | -2.64          | protein chain elongation factor EF-Tu            |      |        |        |
| <i>fusA</i>                               | <i>b3340</i> | -2.46          | -2.30          | GTP-binding protein chain elongation factor EF-G |      |        |        |
| <i>rpmG</i>                               | <i>b3636</i> | -2.30          | -2.64          | 50S ribosomal subunit protein L33                |      |        |        |
| <i>rpmB</i>                               | <i>b3637</i> | -2.30          | -2.64          | 50S ribosomal subunit protein L28                |      |        |        |
| <i>thrU</i>                               | <i>b3976</i> | -3.48          | -2.30          | tRNA <sup>thr</sup> U                            |      |        |        |
| <i>tufB</i>                               | <i>b3980</i> | -2.64          | -3.03          | protein chain elongation factor EF-Tu            |      |        |        |
| <i>rplJ</i>                               | <i>b3985</i> | -3.25          | -2.64          | 50S ribosomal subunit protein L10                |      |        |        |
| <i>rplL</i>                               | <i>b3986</i> | -3.25          | -2.30          | 50S ribosomal subunit protein L7, L12            |      |        |        |

|                      |              |       |       |                                                                                   |     |     |     |
|----------------------|--------------|-------|-------|-----------------------------------------------------------------------------------|-----|-----|-----|
| <i>rpsF</i>          | <i>b4200</i> | -2.83 | -2.14 | 30S ribosomal subunit protein S6                                                  |     |     |     |
| <i>rpsR</i>          | <i>b4202</i> | -3.03 | -2.14 | 30S ribosomal subunit protein S18                                                 |     |     |     |
| <i>prfC</i>          | <i>b4375</i> | 2.30  | 3.73  | peptide chain release factor RF-3                                                 |     |     |     |
| <i>lasT</i>          | <i>b4403</i> | 3.03  | 4.92  | hypothetical protein                                                              |     |     |     |
| <b>Transcription</b> |              |       |       |                                                                                   |     |     |     |
| <i>yahB</i>          | <i>b0316</i> | 2.46  | 6.06  | putative transcriptional regulator (LysR family)                                  |     |     |     |
| <i>ybaO</i>          | <i>b0447</i> | 5.28  | 4.92  | putative LRP-like transcriptional regulator                                       |     |     |     |
| <i>hha</i>           | <i>b0460</i> | 6.96  | 7.46  | haemolysin expression modulating protein                                          |     |     | (3) |
| <i>ybeF</i>          | <i>b0629</i> | 2.14  | 2.30  | putative transcriptional regulator or putative periplasmic binding protein        |     |     |     |
| <i>cspD</i>          | <i>b0880</i> | -3.73 | -3.03 | DNA replication inhibitor, nucleic acid-binding domain, transcriptional regulator |     |     |     |
| <i>ymfK</i>          | <i>b1145</i> | 2.64  | 5.66  | e14 prophage, putative phage repressor                                            |     |     | (5) |
| <i>cysB</i>          | <i>b1275</i> | 8.00  | 4.92  | positive transcriptional regulator for cysteine regulon                           |     |     |     |
| <i>ydcN</i>          | <i>b1434</i> | 3.03  | 6.96  | putative regulator                                                                |     |     |     |
| <i>ydeO</i>          | <i>b1499</i> | 2.83  | 18.38 | putative ARAC-type regulatory protein                                             |     |     |     |
| <i>cspF</i>          | <i>b1558</i> | 2.64  | 18.38 | transcriptional regulator, Qin prophage, cold shock protein                       |     |     |     |
| <i>sdiA</i>          | <i>b1916</i> | 8.00  | 10.56 | transcriptional activator for cell division (LuxR, UhpA family)                   | (3) | (2) | (6) |
| <i>rcsA</i>          | <i>b1951</i> | 2.14  | 2.46  | positive regulator for ctr capsule biosynthesis, positive transcription factor    |     |     |     |
| <i>yegW</i>          | <i>b2101</i> | 2.14  | 2.64  | putative transcriptional regulator                                                |     |     |     |
| <i>molR_1</i>        | <i>b2115</i> | 2.64  | 2.64  | molybdate metabolism regulator, interrupted                                       |     |     |     |
| <i>molR_2</i>        | <i>b2116</i> | 2.46  | 8.00  | twice split molybdate metabolism regulator                                        |     |     |     |
| <i>yfaH</i>          | <i>b2238</i> | 3.25  | 11.31 | hypothetical protein                                                              |     |     |     |
| <i>alpA</i>          | <i>b2624</i> | 4.92  | 9.85  | CP4-57 prophage, transcriptional activator of a P4-like cryptic prophage          |     |     |     |
| <i>ygaV</i>          | <i>b2667</i> | 12.13 | 4.59  | hypothetical protein                                                              |     |     |     |
| <i>gutM</i>          | <i>b2706</i> | 4.92  | 3.48  | glucitol operon transcriptional activator                                         |     |     |     |
| <i>hycA</i>          | <i>b2725</i> | 2.64  | 2.30  | regulatory protein for HycE (part of the FHL complex), transcriptional regulator  |     |     |     |
| <i>rpoS</i>          | <i>b2741</i> | -3.73 | -3.25 | RNA polymerase, sigma S factor, synthesis of many growth phase related proteins   | (3) | (2) |     |
| <i>ygfI</i>          | <i>b2921</i> | 2.30  | 13.93 | putative transcriptional regulator (LysR family)                                  |     |     |     |
| <i>ygiT</i>          | <i>b3021</i> | 6.96  | 4.59  | hypothetical protein                                                              |     |     |     |
| <i>tdcR</i>          | <i>b3119</i> | 3.25  | 6.06  | threonine dehydratase operon transcriptional activator protein                    |     |     |     |
| <i>nlp</i>           | <i>b3188</i> | 2.46  | 2.83  | transcriptional regulatory factor of maltose metabolism                           |     |     |     |
| <i>yhcF</i>          | <i>b3219</i> | 2.46  | 11.31 | putative transcriptional regulator                                                |     |     |     |
| <i>rpoA</i>          | <i>b3295</i> | -4.92 | -3.48 | RNA polymerase, alpha subunit                                                     |     |     |     |
| <i>xylR</i>          | <i>b3569</i> | 2.30  | 3.25  | putative transcriptional regulator of xyl operon                                  |     |     |     |
| <i>yidL</i>          | <i>b3680</i> | 2.83  | 4.92  | putative ARAC-type regulatory protein                                             |     |     |     |
| <i>yidP</i>          | <i>b3684</i> | 2.83  | 6.96  | putative transcriptional regulator                                                |     |     |     |
| <i>bglG</i>          | <i>b3723</i> | 2.14  | 2.30  | positive regulation of bgl operon                                                 |     |     |     |
| <i>asnC</i>          | <i>b3743</i> | 3.03  | 3.48  | AsnC transcriptional dual regulator                                               |     |     | (5) |
| <i>rpoB</i>          | <i>b3987</i> | -2.83 | -2.14 | RNA polymerase, beta subunit                                                      |     |     |     |
| <i>cadC</i>          | <i>b4133</i> | 2.83  | 4.29  | transcriptional activator of cad operon                                           |     |     |     |
| <i>yjfJ</i>          | <i>b4182</i> | 2.14  | 2.14  | conserved hypothetical protein                                                    |     |     |     |

|                                                                     |              |       |       |                                                                        |     |
|---------------------------------------------------------------------|--------------|-------|-------|------------------------------------------------------------------------|-----|
| <i>ytfA</i>                                                         | <i>b4205</i> | 2.46  | 8.00  | hypothetical protein                                                   |     |
| <b>DNA replication, recombination and repair</b>                    |              |       |       |                                                                        |     |
| <i>insA_2</i>                                                       | <i>b0275</i> | 2.64  | 3.48  | CP4-6 prophage, IS1 protein InsA                                       | (5) |
| <i>pinR</i>                                                         | <i>b1374</i> | 4.00  | 4.59  | Rac prophage, putative transposon resolvase                            |     |
| <i>yi22_2</i>                                                       | <i>b1402</i> | 2.30  | 2.14  | IS2 hypothetical protein                                               |     |
| <i>ydcM</i>                                                         | <i>b1432</i> | 2.30  | 9.19  | putative virulence protein                                             |     |
| <i>intQ</i>                                                         | <i>b1579</i> | 2.46  | 3.73  | Qin prophage, putative transposase                                     |     |
| <i>tus</i>                                                          | <i>b1610</i> | 8.00  | 4.59  | DNA-binding protein, inhibition of replication at Ter sites            |     |
| <i>nth</i>                                                          | <i>b1633</i> | 6.96  | 10.56 | endonuclease III, specific for apurinic and, or apyrimidinic sites     |     |
| <i>insA_5</i>                                                       | <i>b1894</i> | 3.25  | 4.92  | IS1 protein InsA                                                       | (5) |
| <i>yfjY</i>                                                         | <i>b2644</i> | 2.64  | 2.64  | CP4-57 prophage, putative DNA repair protein                           |     |
| <i>priB</i>                                                         | <i>b4201</i> | -2.83 | -2.30 | primosomal replication protein N                                       |     |
| <i>yjhS</i>                                                         | <i>b4309</i> | 2.64  | 8.57  | conserved hypothetical protein                                         |     |
| <i>yigW_2</i>                                                       | <i>b4483</i> | 2.64  | 6.50  | magnesium-dependent cytoplasmic DNase                                  |     |
| <b>Cellular processes</b>                                           |              |       |       |                                                                        |     |
| <b>Cell division and chromosome partitioning</b>                    |              |       |       |                                                                        |     |
| <i>ftsL</i>                                                         | <i>b0083</i> | -3.48 | -2.14 | essential cell division protein, ingrowth of wall at septum            |     |
| <i>yefM</i>                                                         | <i>b2017</i> | 6.06  | 3.48  | antitoxin of the YoeB-YefM toxin-antitoxin pair                        |     |
| <i>yhdJ</i>                                                         | <i>b3262</i> | 2.30  | 2.83  | cell cycle-regulated methyltransferase                                 |     |
| <b>Posttranslational modification, protein turnover, chaperones</b> |              |       |       |                                                                        |     |
| <i>clpX</i>                                                         | <i>b0438</i> | -2.46 | -2.30 | ATP-dependent specificity component of clpP serine protease, chaperone |     |
| <i>citC</i>                                                         | <i>b0618</i> | 7.46  | 6.96  | citrate lyase synthetase (citrate (pro-3S)-lyase ligase                |     |
| <i>ybiY</i>                                                         | <i>b0824</i> | 2.83  | 13.93 | putative pyruvate formate lyase activating enzyme                      |     |
| <i>nrfE</i>                                                         | <i>b4074</i> | 2.46  | 8.00  | formate-dependent nitrite reductase, possible assembly function        |     |
| <i>nrfG</i>                                                         | <i>b4076</i> | 2.30  | 4.92  | part of formate-dependent nitrite reductase complex                    |     |
| <b>Cell envelope biogenesis, outer membrane</b>                     |              |       |       |                                                                        |     |
| <i>murE</i>                                                         | <i>b0085</i> | -2.46 | -2.14 | UDP-N-acetylmuramoylalanyl-D-glutamate 2,6-diaminopimelate ligase      | (6) |
| <i>phoE</i>                                                         | <i>b0241</i> | 3.03  | 2.00  | Outer membrane pore protein E                                          |     |
| <i>lpxC</i>                                                         | <i>b0096</i> | -2.46 | -3.48 | UDP-3-O-acyl N-acetylglucosamine deacetylase                           |     |
| <i>yaeT</i>                                                         | <i>b0177</i> | -3.48 | -2.14 | protein with possible extracytoplasmic function                        | (3) |
| <i>hlpA</i>                                                         | <i>b0178</i> | -2.64 | -2.30 | periplasmic molecular chaperone for outer membrane proteins            |     |
| <i>csge</i>                                                         | <i>b1039</i> | 3.25  | 8.57  | curli production assembly, transport component, 2nd curli operon       |     |
| <i>rspA</i>                                                         | <i>b1581</i> | 2.30  | 18.38 | putative dehydratase, starvation-sensing protein                       |     |
| <i>cfa</i>                                                          | <i>b1661</i> | -2.46 | -2.14 | cyclopropane fatty acyl phospholipid synthase                          |     |
| <i>ydiY</i>                                                         | <i>b1722</i> | 2.14  | 6.50  | conserved hypothetical protein                                         |     |
| <i>yeeZ</i>                                                         | <i>b2016</i> | 2.14  | 3.03  | putative enzyme of sugar metabolism                                    |     |
| <i>wcaE</i>                                                         | <i>b2055</i> | 3.03  | 19.70 | putative colanic acid biosynthesis glycosyl transferase                |     |
| <i>wcaA</i>                                                         | <i>b2059</i> | 4.00  | 3.48  | putative glycosyl transferase, colanic acid synthesis                  |     |
| <i>ompC</i>                                                         | <i>b2215</i> | -2.83 | -2.14 | outer membrane pore protein, OmpC                                      | (6) |
| <i>ypdI</i>                                                         | <i>b2376</i> | 2.83  | 9.85  | colanic acid synthesis lipoprotein                                     |     |

|                                               |              |       |       |                                                                                                              |        |     |
|-----------------------------------------------|--------------|-------|-------|--------------------------------------------------------------------------------------------------------------|--------|-----|
| <i>yfiB</i>                                   | <i>b2605</i> | 3.03  | 6.96  | putative outer membrane protein                                                                              |        |     |
| <i>pbl</i>                                    | <i>b2854</i> | 4.00  | 7.46  | conserved protein, lysozyme-like                                                                             |        |     |
| <i>agaS</i>                                   | <i>b3136</i> | 3.25  | 3.25  | putative tagatose-6-phosphate aldose, ketose isomerase                                                       |        |     |
| <i>acrE</i>                                   | <i>b3265</i> | 18.38 | 9.19  | indole transport, transmembrane protein, cell membrane permeability                                          |        | (8) |
| <i>yhfN</i>                                   | <i>b3371</i> | 3.03  | 10.56 | fructoselysine 6-phosphate deglycase monomer                                                                 |        |     |
| <i>yiaT</i>                                   | <i>b3584</i> | 2.14  | 2.46  | putative outer membrane protein                                                                              |        |     |
| <i>yibD</i>                                   | <i>b3615</i> | 2.64  | 2.14  | putative glycosyltransferase                                                                                 |        |     |
| <i>gidB</i>                                   | <i>b3740</i> | 2.46  | 3.48  | glucose-inhibited division protein, protein with a methyltransferase fold and role in chromosome replication |        |     |
| <b>Cell motility and secretion</b>            |              |       |       |                                                                                                              |        |     |
| <i>yadC</i>                                   | <i>b0135</i> | 2.46  | 2.64  | putative fimbrial-like protein                                                                               |        |     |
| <i>ybgP</i>                                   | <i>b0717</i> | 2.14  | 4.00  | putative chaperone                                                                                           |        |     |
| <i>ybgD</i>                                   | <i>b0719</i> | 2.14  | 3.25  | putative fimbrial-like protein                                                                               |        |     |
| <i>flgI</i>                                   | <i>b1080</i> | 7.46  | 4.92  | homolog of Salmonella P-ring of flagella basal body                                                          | (5)    | (4) |
| <i>flhA</i>                                   | <i>b1879</i> | 2.14  | 8.00  | flagellar biosynthesis, possible export of flagellar proteins                                                |        |     |
| <i>cheZ</i>                                   | <i>b1881</i> | 2.30  | 6.50  | chemotactic response, CheY protein phosphatase                                                               | (5)    | (2) |
| <i>fliL</i>                                   | <i>b1944</i> | 2.46  | 3.25  | flagellar biosynthesis                                                                                       | (5)    |     |
| <i>fliQ</i>                                   | <i>b1949</i> | 3.25  | 5.66  | flagellar biosynthesis                                                                                       | (5, 7) |     |
| <i>fliR</i>                                   | <i>b1950</i> | 2.64  | 2.46  | flagellar biosynthesis                                                                                       | (7)    |     |
| <i>yehC</i>                                   | <i>b2110</i> | 2.14  | 2.83  | putative chaperone                                                                                           |        |     |
| <i>yfcV</i>                                   | <i>b2339</i> | 3.03  | 4.92  | putative fimbrial-like protein                                                                               |        |     |
| <i>ygiL</i>                                   | <i>b3043</i> | 2.83  | 2.83  | putative fimbrial-like protein                                                                               |        |     |
| <i>yhcA</i>                                   | <i>b3215</i> | 4.29  | 14.93 | putative chaperone                                                                                           |        |     |
| <i>yhcD</i>                                   | <i>b3216</i> | 2.14  | 3.25  | putative outer membrane protein                                                                              |        |     |
| <i>fimC</i>                                   | <i>b4316</i> | 2.14  | 3.03  | periplasmic chaperone, required for type 1 fimbriae                                                          |        |     |
| <i>fimD</i>                                   | <i>b4317</i> | 3.03  | 7.46  | outer membrane protein, export and assembly of type 1 fimbriae, interrupted                                  |        |     |
| <b>Inorganic ion transport and metabolism</b> |              |       |       |                                                                                                              |        |     |
| <i>phoA</i>                                   | <i>b0383</i> | 2.00  | 3.73  | Alkaline phosphatase protein                                                                                 |        | (6) |
| <i>phoR</i>                                   | <i>b0400</i> | 2.00  | 2.64  | Phosphate regulon sensor protein PhoR                                                                        |        | (6) |
| <i>ybjW</i>                                   | <i>b0873</i> | 4.00  | 4.92  | hybrid-cluster protein, hydroxylamine reductase                                                              |        |     |
| <i>yncD</i>                                   | <i>b1451</i> | 2.30  | 2.64  | Probable TonB-dependent receptor                                                                             |        |     |
| <i>ydiE</i>                                   | <i>b1705</i> | 3.73  | 3.25  | conserved hypothetical protein                                                                               |        |     |
| <i>ftn</i>                                    | <i>b1905</i> | 2.30  | 2.83  | cytoplasmic ferritin (an iron storage protein)                                                               |        |     |
| <i>b1995</i>                                  | <i>b1995</i> | 6.06  | 8.00  | CP4-44 prophage, putative hemine receptor, predicted zinc-regulated protein                                  |        |     |
| <i>yfeO</i>                                   | <i>b2389</i> | 2.30  | 3.48  | hypothetical protein                                                                                         |        |     |
| <i>focB</i>                                   | <i>b2492</i> | 14.93 | 2.64  | probable formate transporter (formate channel 2)                                                             |        |     |
| <i>ygaP</i>                                   | <i>b2668</i> | 9.19  | 5.66  | putative phosphatase                                                                                         |        |     |
| <i>nirD</i>                                   | <i>b3366</i> | 3.73  | 8.57  | nitrite reductase (NAD(P)H) subunit                                                                          |        |     |
| <i>yieL</i>                                   | <i>b3719</i> | 6.06  | 6.50  | putative xylanase                                                                                            |        |     |
| <i>phnG</i>                                   | <i>b4101</i> | 2.46  | 3.03  | phosphonate metabolism                                                                                       |        |     |

|                                                |              |       |       |                                                                                   |     |
|------------------------------------------------|--------------|-------|-------|-----------------------------------------------------------------------------------|-----|
| <i>phnC</i>                                    | <i>b4106</i> | 2.14  | 3.48  | ATP-binding component of phosphonate transport, ABC transporter                   |     |
| <b>Signal transduction mechanisms</b>          |              |       |       |                                                                                   |     |
| <i>fimZ</i>                                    | <i>b0535</i> | 2.14  | 13.93 | fimbrial protein Z, putative transcriptional regulator of fimbrial expression     |     |
| <i>ycdT</i>                                    | <i>b1025</i> | 4.29  | 4.00  | hypothetical protein                                                              |     |
| <i>ydiV</i>                                    | <i>b1707</i> | 3.03  | 12.13 | conserved hypothetical protein                                                    |     |
| <i>yedW</i>                                    | <i>b1969</i> | 3.48  | 4.00  | putative 2-component transcriptional regulator                                    |     |
|                                                |              |       |       | hybrid sensory histidine kinase in two-component regulatory system, regulates     |     |
| <i>evgS</i>                                    | <i>b2370</i> | 2.64  | 3.73  | multidrug resistance                                                              | (3) |
| <i>pphB</i>                                    | <i>b2734</i> | 2.64  | 2.14  | protein phosphatase 2 , protein-tyrosine-phosphatase , phosphoprotein phosphatase |     |
| <i>chpA</i>                                    | <i>b2782</i> | 2.64  | 2.64  | putative growth inhibitor A, exhibits ribonuclease activity                       |     |
| <i>barA</i>                                    | <i>b2786</i> | 2.30  | 2.14  | hybrid sensory histidine kinase in two-component regulatory system with UvrY      |     |
| <i>b2856</i>                                   | <i>b2856</i> | 2.30  | 6.06  | hypothetical protein                                                              |     |
| <i>yjjQ</i>                                    | <i>b4365</i> | 2.46  | 4.59  | putative regulator                                                                |     |
| <i>creC</i>                                    | <i>b4399</i> | 3.48  | 4.00  | catabolite repression sensor kinase for PhoB, alternative sensor for pho regulon  |     |
| <b>Intracellular trafficking and secretion</b> |              |       |       |                                                                                   |     |
| <i>ecfA</i>                                    | <i>b2970</i> | 3.03  | 6.50  | putative general secretion pathway for protein export (GSP)                       |     |
| <i>prlA</i>                                    | <i>b3300</i> | -4.00 | -3.25 | preprotein translocase, membrane component, transport across inner membrane       |     |
| <i>yheE</i>                                    | <i>b3324</i> | 3.03  | 2.83  | putative export protein C for general secretion pathway (GSP)                     |     |
| <i>yheI</i>                                    | <i>b3331</i> | 2.83  | 12.13 | putative export protein J for general secretion pathway (GSP)                     |     |
| <b>Defense mechanisms</b>                      |              |       |       |                                                                                   |     |
| <i>emrK</i>                                    | <i>b2368</i> | 2.64  | 2.30  | multidrug resistance protein K, putative membrane fusion protein                  |     |
| <i>acrF</i>                                    | <i>b3266</i> | 4.29  | 8.57  | integral transmembrane protein, acridine resistance, Drug Efflux Transport System | (8) |
| <i>dinF</i>                                    | <i>b4044</i> | 2.30  | 9.85  | DNA-damage-inducible protein F, MATE Transporter                                  |     |
| <i>mcrC</i>                                    | <i>b4345</i> | 2.83  | 2.14  | component of 5-methylcytosine-specific restriction enzyme McrBC                   |     |
| <b>Metabolism</b>                              |              |       |       |                                                                                   |     |
| <b>Energy production and conversion</b>        |              |       |       |                                                                                   |     |
| <i>fixA</i>                                    | <i>b0041</i> | 2.30  | 14.93 | probable flavoprotein subunit required for anaerobic carnitine metabolism         |     |
| <i>aceE</i>                                    | <i>b0114</i> | -2.14 | -2.30 | subunit of E1p component of pyruvate dehydrogenase complex                        |     |
| <i>prpC</i>                                    | <i>b0333</i> | 5.28  | 3.03  | methylcitrate synthase (citrate synthase 2)                                       |     |
| <i>ylbC</i>                                    | <i>b0517</i> | 2.64  | 4.59  | ureidoglycolate dehydrogenase                                                     |     |
| <i>dcuC</i>                                    | <i>b0621</i> | 3.03  | 3.25  | dicarboxylate transport protein (DcuC family)                                     |     |
| <i>gltA</i>                                    | <i>b0720</i> | -3.03 | -3.03 | citrate synthase monomer                                                          | (5) |
| <i>sdhC</i>                                    | <i>b0721</i> | -4.29 | -3.25 | succinate dehydrogenase membrane protein                                          |     |
| <i>sdhD</i>                                    | <i>b0722</i> | -4.00 | -2.83 | succinate dehydrogenase membrane protein                                          |     |
| <i>sdhA</i>                                    | <i>b0723</i> | -4.29 | -3.73 | succinate dehydrogenase, catalytic and NAD, flavoprotein subunit                  |     |
|                                                |              |       |       | 2-oxoglutarate decarboxylase, component of the 2-oxoglutarate dehydrogenase       |     |
|                                                |              |       |       | complex, thiamin-binding                                                          |     |
| <i>sucA</i>                                    | <i>b0726</i> | -4.00 | -3.73 | 2-oxoglutarate dehydrogenase (dihydrolipoyltranssuccinase E2 component)           |     |
| <i>sucB</i>                                    | <i>b0727</i> | -5.66 | -3.48 | succinyl-CoA synthetase, beta subunit                                             | (5) |
| <i>sucC</i>                                    | <i>b0728</i> | -4.92 | -2.64 | putative cytochrome                                                               |     |
| <i>yceJ</i>                                    | <i>b1057</i> | 2.30  | 2.83  |                                                                                   |     |

|                                              |              |       |       |                                                                                    |         |
|----------------------------------------------|--------------|-------|-------|------------------------------------------------------------------------------------|---------|
| <i>icdA</i>                                  | <i>b1136</i> | -2.14 | -2.64 | e14 prophage, isocitrate dehydrogenase, specific for NADP+                         |         |
| <i>aldA</i>                                  | <i>b1415</i> | -2.64 | -3.73 | putative succinate-semialdehyde dehydrogenase, aldehyde dehydrogenase              | (6)     |
| <i>rsxA</i>                                  | <i>b1627</i> | 2.83  | 10.56 | integral membrane protein of SoxR-reducing complex, electron transport             |         |
| <i>rsxG</i>                                  | <i>b1631</i> | 3.48  | 2.30  | member of SoxR-reducing complex, electron transport                                |         |
| <i>ydhV</i>                                  | <i>b1673</i> | 2.14  | 3.48  | putative oxidoreductase                                                            |         |
| <i>astD</i>                                  | <i>b1746</i> | -2.30 | -2.46 | succinylglutamic semialdehyde dehydrogenase                                        | (3) (1) |
| <i>napA</i>                                  | <i>b2206</i> | 6.50  | 4.00  | molybdoprotein, periplasmic nitrate reductase, large subunit, in complex with NapB |         |
| <i>hyfD</i>                                  | <i>b2484</i> | 9.19  | 6.50  | hydrogenase 4 membrane subunit                                                     |         |
| <i>hyfG</i>                                  | <i>b2487</i> | 2.30  | 4.92  | hydrogenase 4 subunit                                                              |         |
| <i>ygeT</i>                                  | <i>b2867</i> | 3.03  | 4.59  | putative xanthine dehydrogenase subunit, FAD-binding domain                        |         |
| <i>ttdA</i>                                  | <i>b3061</i> | 7.46  | 5.66  | L-tartrate dehydratase, alpha subunit                                              |         |
| <i>ebgA</i>                                  | <i>b3076</i> | 2.46  | 4.29  | beta-D-galactosidase, ebg operon, alpha subunit, cryptic gene                      |         |
| <i>tdcD</i>                                  | <i>b3115</i> | 2.83  | 19.70 | propionate kinase, acetate kinase II, anaerobic                                    |         |
| <i>yiaI</i>                                  | <i>b3573</i> | 2.14  | 4.92  | hypothetical protein                                                               |         |
| <i>yiaK</i>                                  | <i>b3575</i> | 2.14  | 5.66  | 2,3-diketo-L-gulonate dehydrogenase, NADH-dependent                                |         |
| <i>yibA</i>                                  | <i>b3594</i> | 2.83  | 4.00  | putative lyase                                                                     | (3)     |
| <i>atpB</i>                                  | <i>b3738</i> | -2.30 | -2.14 | membrane-bound ATP synthase, F0 sector, subunit a                                  |         |
| <i>fdoG</i>                                  | <i>b3894</i> | -2.30 | -2.83 | formate dehydrogenase-O, major subunit                                             |         |
| <i>nrfB</i>                                  | <i>b4071</i> | 3.25  | 6.50  | formate-dependent nitrite reductase, a penta-haeme cytochrome c                    |         |
| <i>fumB</i>                                  | <i>b4122</i> | 9.19  | 6.96  | fumarase B, anaerobic isozyme                                                      |         |
| <b>Carbohydrate transport and metabolism</b> |              |       |       |                                                                                    |         |
| <i>prpB</i>                                  | <i>b0331</i> | 8.57  | 3.25  | 2-methylisocitrate lyase, putative carboxyphosphoenolpyruvate mutase               |         |
| <i>torT</i>                                  | <i>b0994</i> | 5.28  | 6.50  | part of regulation of tor operon, periplasmic, unknown inducer                     |         |
| <i>ycjT</i>                                  | <i>b1316</i> | 3.03  | 17.15 | putative enzyme                                                                    |         |
| <i>ycjV</i>                                  | <i>b1318</i> | 2.14  | 6.06  | putative ATP-binding component of a transport system                               |         |
| <i>lsrA</i>                                  | <i>b1513</i> | 2.00  | 6.06  | ATPase in AI-2 transport                                                           | (9)     |
| <i>lsrD</i>                                  | <i>b1515</i> | 2.07  | 4.00  | membrane channel proteins involved in transport of AI-2                            | (9)     |
| <i>lsrK</i>                                  | <i>b1511</i> | 2.52  | 2.14  | AI-2 kinase                                                                        | (9)     |
| <i>ydjI</i>                                  | <i>b1773</i> | 2.14  | 8.00  | putative aldolase                                                                  |         |
| <i>manZ</i>                                  | <i>b1819</i> | 3.73  | 4.92  | PTS enzyme IID, mannose-specific                                                   |         |
| <i>gatZ</i>                                  | <i>b2095</i> | -5.66 | -2.64 | tagatose-1,6-bisphosphate aldolase 2                                               |         |
| <i>gatY</i>                                  | <i>b2096</i> | -2.83 | -3.25 | tagatose-1,6-bisphosphate aldolase 2, subunit with GatZ                            |         |
| <i>dsdX</i>                                  | <i>b2365</i> | 2.00  | 9.19  | permease                                                                           | (6)     |
| <i>emrY</i>                                  | <i>b2367</i> | 3.48  | 2.46  | putative multidrug MFS transporter                                                 |         |
| <i>iktB</i>                                  | <i>b2465</i> | -3.73 | -2.46 | transketolase 2 isozyme                                                            | (4)     |
| <i>srlE</i>                                  | <i>b2703</i> | 3.03  | 14.93 | PTS family enzyme IIBC, glucitol, sorbitol-specific                                |         |
| <i>yqcE</i>                                  | <i>b2775</i> | 2.14  | 7.46  | putative transport protein, MFS transporter                                        |         |
| <i>fucP</i>                                  | <i>b2801</i> | 2.46  | 13.00 | fructose permease, MFS transporter                                                 |         |
| <i>galP</i>                                  | <i>b2943</i> | 2.30  | 7.46  | galactose-proton symport of transport system, MFS transporter                      |         |
| <i>agaW</i>                                  | <i>b3134</i> | 4.00  | 6.06  | PTS family enzyme IIC component 2, N-acetylgalactosamine-specific                  |         |

|                                            |              |       |       |                                                                             |         |
|--------------------------------------------|--------------|-------|-------|-----------------------------------------------------------------------------|---------|
| <i>agaB</i>                                | <i>b3138</i> | 2.30  | 6.50  | PTS family enzyme IIB component 1, N-acetylgalactosamine-specific           |         |
| <i>agaC</i>                                | <i>b3139</i> | 2.64  | 4.92  | PTS family enzyme IIC component 1, N-acetylgalactosamine-specific           |         |
| <i>agaD</i>                                | <i>b3140</i> | 9.19  | 5.66  | PTS family enzyme IID, N-acetylglucosamine-specific                         |         |
| <i>yhfC</i>                                | <i>b3364</i> | 3.48  | 2.46  | putative transport, MFS transporter                                         |         |
| <i>yhjX</i>                                | <i>b3547</i> | 2.30  | 4.92  | putative oxalate:formate antiporter (MFS family)                            |         |
| <i>yiaM</i>                                | <i>b3577</i> | 2.46  | 10.56 | YiaMNO Binding Protein-dependent Secondary (TRAP) Transporter               |         |
| <i>sgbU</i>                                | <i>b3582</i> | 2.46  | 4.59  | 3-epimerase, probable 3-hexulose-6-phosphate isomerase                      |         |
| <i>sgbE</i>                                | <i>b3583</i> | 2.30  | 3.25  | L-ribulose-5-phosphate 4-epimerase                                          |         |
| <i>yidY</i>                                | <i>b3710</i> | 4.00  | 19.70 | drug, chloramphenicol transport protein (MFS family)                        |         |
| <i>yieC</i>                                | <i>b3720</i> | 3.48  | 2.83  | carbohydrate-specific outer membrane porin putative receptor protein        |         |
| <i>yihN</i>                                | <i>b3874</i> | 10.56 | 11.31 | putative resistance protein, MFS transporter                                |         |
| <i>malK</i>                                | <i>b4035</i> | 9.19  | 5.66  | ATP-binding component of transport system for maltose and maltodextrin      |         |
| <i>idnK</i>                                | <i>b4268</i> | 2.14  | 2.14  | D-gluconate kinase, thermosensitive                                         |         |
| <i>yjiJ</i>                                | <i>b4332</i> | 2.30  | 2.64  | putative sugar transport protein                                            |         |
| <i>gpmB</i>                                | <i>b4395</i> | 2.64  | 6.50  | phosphoglyceromutase 2                                                      | (3)     |
| <b>Amino acid transport and metabolism</b> |              |       |       |                                                                             |         |
| <i>yahI</i>                                | <i>b0323</i> | 2.30  | 3.48  | putative carbamate kinase                                                   |         |
| <i>pheP</i>                                | <i>b0576</i> | 3.25  | 2.83  | phenylalanine transport protein (APC family)                                |         |
| <i>potG</i>                                | <i>b0855</i> | 2.30  | 5.66  | ATP-binding component of putrescine ABC transport system                    |         |
| <i>potI</i>                                | <i>b0857</i> | 2.14  | 6.96  | putrescine transport protein (ABC superfamily, membrane)                    |         |
| <i>artJ</i>                                | <i>b0860</i> | 4.00  | 5.28  | arginine 3rd transport system periplasmic binding protein (ABC transporter) |         |
| <i>ycaM</i>                                | <i>b0899</i> | 2.64  | 7.46  | putative amino-acid transport protein (APC family)                          |         |
| <i>ansP</i>                                | <i>b1453</i> | 2.30  | 2.30  | L-asparagine permease                                                       |         |
| <i>ydiN</i>                                | <i>b1691</i> | 3.03  | 2.30  | putative amino acid, amine transport protein, MFS transporter               |         |
| <i>astB</i>                                | <i>b1745</i> | -2.64 | -2.30 | succinylarginine dihydrolase                                                | (1)     |
| <i>ynjC</i>                                | <i>b1755</i> | 2.30  | 3.48  | putative transport protein (ABC superfamily, membrane)                      |         |
| <i>ydjJ</i>                                | <i>b1774</i> | 2.83  | 4.00  | putative dehydrogenase, oxidoreductase, NAD(P)-binding                      |         |
| <i>ydjL</i>                                | <i>b1776</i> | 2.30  | 2.14  | hypothetical zinc-type alcohol dehydrogenase-like protein                   |         |
| <i>yeaU</i>                                | <i>b1800</i> | 2.30  | 5.66  | putative tartrate dehydrogenase                                             |         |
| <i>yeeF</i>                                | <i>b2014</i> | 3.03  | 6.50  | putative amino acid transport protein (APC family)                          |         |
| <i>hisI</i>                                | <i>b2026</i> | 2.14  | 6.50  | phosphoribosyl-AMP cyclohydrolase                                           |         |
| <i>eutA</i>                                | <i>b2451</i> | 10.56 | 3.48  | CPPZ-55 prophage, chaperonin in ethanolamine utilization                    |         |
| <i>gabT</i>                                | <i>b2662</i> | -3.73 | -2.30 | 4-aminobutyrate aminotransferase activity                                   | (3) (1) |
| <i>proW</i>                                | <i>b2678</i> | 4.59  | 4.92  | glycine, betaine, proline transport protein (ABC superfamily, membrane)     |         |
| <i>ygeY</i>                                | <i>b2872</i> | 3.03  | 8.57  | putative deacetylase                                                        |         |
| <i>mtr</i>                                 | <i>b3161</i> | -2.46 | -6.06 | tryptophan-specific transport protein                                       | (8)     |
| <i>nanT</i>                                | <i>b3224</i> | 2.30  | 6.50  | sialic acid transport protein (MFS family)                                  |         |
| <i>argR</i>                                | <i>b3237</i> | 2.14  | 4.29  | repressor of arg regulon, cer-mediated site specific recombination          |         |
| <i>yhdX</i>                                | <i>b3269</i> | 3.03  | 2.64  | putative amino acid transport protein (ABC superfamily, membrane)           |         |
| <i>yhfM</i>                                | <i>b3370</i> | 8.57  | 5.28  | putative amino acid, amine transport protein, APC transporter               |         |

|                                                                            |              |       |       |                                                                                     |     |     |
|----------------------------------------------------------------------------|--------------|-------|-------|-------------------------------------------------------------------------------------|-----|-----|
| <i>tnaB</i>                                                                | <i>b3709</i> | 2.46  | 2.46  | low affinity tryptophan permease, TnaB tryptophan ArAAP transporter                 | (3) | (1) |
| <i>yjdE</i>                                                                | <i>b4115</i> | 2.64  | 2.64  | putative amino acid, amine transport protein, cryptic                               |     |     |
| <b><i>Nucleotide transport and metabolism</i></b>                          |              |       |       |                                                                                     |     |     |
| <i>purF</i>                                                                | <i>b2312</i> | 2.46  | 3.48  | amidophosphoribosyltransferase (PRPP amidotransferase)                              | (5) |     |
| <i>uraA</i>                                                                | <i>b2497</i> | 6.06  | 6.06  | uracil transport                                                                    |     |     |
| <i>ygfU</i>                                                                | <i>b2888</i> | 2.14  | 2.14  | putative permease                                                                   |     |     |
| <i>yicE</i>                                                                | <i>b3654</i> | 2.64  | 3.25  | putative purine, xanthine transport protein (NCS2 family)                           | (5) |     |
| <b><i>Coenzyme transport and metabolism</i></b>                            |              |       |       |                                                                                     |     |     |
| <i>citG</i>                                                                | <i>b0613</i> | 6.06  | 4.59  | triphosphoribosyl-dephospho-CoA synthase                                            |     |     |
| <i>bioD</i>                                                                | <i>b0778</i> | 2.14  | 3.48  | dethiobiotin synthetase                                                             |     |     |
| <i>moeB</i>                                                                | <i>b0826</i> | 2.30  | 3.03  | ATP-dependent adenylate transferase, molybdopterin biosynthesis                     |     |     |
| <i>ygcM</i>                                                                | <i>b2765</i> | 2.14  | 2.14  | putative 6-pyruvoyl tetrahydrobiopterin synthase                                    |     |     |
| <i>btuB</i>                                                                | <i>b3966</i> | 2.46  | 2.83  | outer membrane porin: vitamin B12, cobalamin transport                              |     | (6) |
| <i>thiH</i>                                                                | <i>b3990</i> | 3.03  | 6.96  | thiamin (thiazole moiety) biosynthesis protein                                      | (3) |     |
| <b><i>Lipid transport and metabolism</i></b>                               |              |       |       |                                                                                     |     |     |
| <i>htrL</i>                                                                | <i>b3618</i> | 9.19  | 8.00  | involved in lipopolysaccharide biosynthesis                                         |     |     |
| <i>yihG</i>                                                                | <i>b3862</i> | 2.30  | 2.83  | putative endonuclease                                                               |     |     |
| <i>acs</i>                                                                 | <i>b4069</i> | -3.03 | -2.64 | putative hydroxycinnamate-CoA ligase, acetyl-CoA synthetase                         |     |     |
| <b><i>Secondary metabolites biosynthesis, transport and catabolism</i></b> |              |       |       |                                                                                     |     |     |
| <i>dhaR</i>                                                                | <i>b1201</i> | 2.46  | 4.59  | probable transcription activator for the dha operon, putative 2-component regulator |     |     |
| <i>kduD</i>                                                                | <i>b2842</i> | 2.83  | 5.66  | 2-deoxy-D-gluconate 3-dehydrogenase                                                 | (5) |     |
| <i>ygfF</i>                                                                | <i>b2902</i> | 3.73  | 6.06  | putative oxidoreductase                                                             |     |     |
| <i>yjgI</i>                                                                | <i>b4249</i> | 8.57  | 3.73  | putative oxidoreductase                                                             |     |     |
| <b>Poorly characterized</b>                                                |              |       |       |                                                                                     |     |     |
| <b><i>Prophage genes and phage related functions</i></b>                   |              |       |       |                                                                                     |     |     |
| <i>yi82_1</i>                                                              | <i>b0017</i> | 3.03  | 2.64  | IS186 and IS421 hypothetical protein                                                |     |     |
| <i>ykfI</i>                                                                | <i>b0245</i> | 2.14  | 4.59  | toxin of the YkfI-YafW toxin-antitoxin pair                                         | (3) |     |
| <i>yafX</i>                                                                | <i>b0248</i> | 11.31 | 7.46  | hypothetical protein, CP4-6 prophage                                                |     |     |
| <i>b0538</i>                                                               | <i>b0538</i> | 2.46  | 2.30  | DLP12 prophage, putative sensory transduction regulator                             |     |     |
| <i>ybcQ</i>                                                                | <i>b0551</i> | 2.64  | 5.28  | DLP12 prophage, putative antitermination protein Q                                  |     |     |
| <i>ybcW</i>                                                                | <i>b0559</i> | 2.14  | 6.06  | DLP12 prophage, hypothetical protein                                                |     |     |
| <i>ybcY</i>                                                                | <i>b0562</i> | 3.25  | 11.31 | DLP12 prophage, homolog of phage 21 head protein, putative methylase                |     |     |
| <i>ybfL</i>                                                                | <i>b0705</i> | 2.14  | 2.64  | putative receptor protein                                                           |     |     |
| <i>ymfJ</i>                                                                | <i>b1144</i> | 2.30  | 2.30  | e14 prophage, hypothetical protein                                                  |     |     |
| <i>ydaD</i>                                                                | <i>b1352</i> | 2.14  | 2.83  | Kil protein (killing function) of lambdoid prophage Rac                             | (4) |     |
| <i>sieB</i>                                                                | <i>b1353</i> | 2.46  | 4.00  | Rac prophage, phage superinfection exclusion protein                                |     |     |
| <i>b1354</i>                                                               | <i>b1354</i> | 2.46  | 2.46  | Rac prophage, hypothetical protein                                                  |     |     |
| <i>ydaR</i>                                                                | <i>b1356</i> | 2.30  | 2.14  | Rac prophage repressor, hypothetical protein                                        | (4) |     |
| <i>ydaY</i>                                                                | <i>b1366</i> | 2.30  | 10.56 | Rac prophage, hypothetical protein                                                  |     |     |
| <i>ynaE</i>                                                                | <i>b1375</i> | 4.59  | 7.46  | Rac prophage, hypothetical protein                                                  |     |     |



|                                         |              |       |       |                                                             |     |
|-----------------------------------------|--------------|-------|-------|-------------------------------------------------------------|-----|
| <i>ynfN</i>                             | <i>b1551</i> | 2.14  | 2.30  | Qin prophage, hypothetical protein                          |     |
| <i>ydfP</i>                             | <i>b1553</i> | 2.14  | 4.59  | Qin prophage, hypothetical protein                          | (3) |
| <i>rem</i>                              | <i>b1561</i> | 2.83  | 2.64  | Qin prophage, hypothetical protein                          |     |
| <i>b1567</i>                            | <i>b1567</i> | 2.30  | 9.19  | Qin prophage, hypothetical protein                          | (3) |
| <i>dicB</i>                             | <i>b1575</i> | 2.46  | 2.30  | Qin prophage, inhibitor of cell division                    | (3) |
| <i>ydfD</i>                             | <i>b1576</i> | 2.46  | 4.92  | Qin prophage, hypothetical protein                          |     |
| <i>yeeT</i>                             | <i>b2003</i> | 2.46  | 2.83  | CP4-44 prophage, hypothetical protein                       |     |
| <i>yeeU</i>                             | <i>b2004</i> | 2.64  | 12.13 | CP4-44 prophage, putative structural protein, antitoxin     |     |
| <i>wcaD</i>                             | <i>b2056</i> | 2.64  | 2.46  | putative colanic acid polymerase                            |     |
| <i>yfdI</i>                             | <i>b2352</i> | 2.14  | 6.50  | CPS-53 (KpLE1) prophage, putative ligase                    |     |
| <i>yfdL</i>                             | <i>b2355</i> | 2.64  | 3.25  | CPS-53 (KpLE1) prophage, putative RNA polymerase beta       |     |
| <i>yfdN</i>                             | <i>b2357</i> | 3.48  | 9.85  | CPS-53 (KpLE1) prophage, putative transcriptional regulator |     |
| <i>yfdQ</i>                             | <i>b2360</i> | 2.14  | 2.46  | CPS-53 (KpLE1) prophage, hypothetical protein               |     |
| <i>yffH</i>                             | <i>b2623</i> | 2.14  | 2.14  | CP4-57 prophage, putative histone                           |     |
| <i>yffJ</i>                             | <i>b2626</i> | 3.03  | 3.25  | CP4-57 prophage, hypothetical protein                       |     |
| <i>yffT</i>                             | <i>b2637</i> | 3.03  | 5.28  | CP4-57 prophage, hypothetical protein                       |     |
| <i>b2640</i>                            | <i>b2640</i> | 2.14  | 12.13 | CP4-57 prophage, hypothetical protein                       |     |
| <i>yffW</i>                             | <i>b2642</i> | 3.03  | 2.14  | CP4-57 prophage, hypothetical protein                       |     |
| <i>yffZ</i>                             | <i>b2645</i> | 2.83  | 3.03  | CP4-57 prophage, hypothetical protein                       |     |
| <i>yjgY</i>                             | <i>b4276</i> | 2.14  | 3.73  | KpLE2 phage-like element                                    |     |
| <i>yi91b</i>                            | <i>b4283</i> | 2.14  | 3.73  | KpLE2 phage-like element, IS911 protein                     |     |
| <i>yjiP</i>                             | <i>b4338</i> | 17.15 | 13.00 | hypothetical protein                                        |     |
| <b>General function prediction only</b> |              |       |       |                                                             |     |
| <i>yahK</i>                             | <i>b0325</i> | -3.25 | -2.64 | putative dehydrogenase, oxidoreductase, NAD(P)-binding      |     |
| <i>prpD</i>                             | <i>b0334</i> | 6.96  | 3.48  | 2-methyl citrate dehydratase                                |     |
| <i>yaiX</i>                             | <i>b0359</i> | 3.25  | 2.30  | putative acyl transferase                                   |     |
| <i>ylaD</i>                             | <i>b0459</i> | 11.31 | 22.63 | maltose O-acetyltransferase                                 |     |
| <i>ybbM</i>                             | <i>b0491</i> | 2.30  | 2.14  | putative metal resistance protein                           |     |
| <i>ybfP</i>                             | <i>b0689</i> | 4.00  | 13.93 | putative pectinase                                          |     |
| <i>ybhM</i>                             | <i>b0787</i> | 4.29  | 6.06  | hypothetical protein                                        |     |
| <i>ycaK</i>                             | <i>b0901</i> | 2.64  | 14.93 | putative NAD(P)H dehydrogenase                              |     |
| <i>ycgY</i>                             | <i>b1196</i> | 2.30  | 2.46  | putative enzyme                                             |     |
| <i>ycjM</i>                             | <i>b1309</i> | 2.14  | 3.48  | putative polysaccharide hydrolase                           |     |
| <i>pqqL</i>                             | <i>b1494</i> | 3.03  | 18.38 | putative zinc protease                                      | (3) |
| <i>yddA</i>                             | <i>b1496</i> | 2.30  | 2.83  | putative ABC transport system ATP-binding protein           |     |
| <i>ydeM</i>                             | <i>b1497</i> | 2.14  | 5.66  | putative enzyme                                             |     |
| <i>ydeQ</i>                             | <i>b1502</i> | 2.46  | 13.93 | putative adhesin, similar to FimH protein                   | (3) |
| <i>ydfQ</i>                             | <i>b1554</i> | 2.14  | 2.14  | Qin prophage, putative lysozyme                             |     |
| <i>ydiO</i>                             | <i>b1695</i> | 3.03  | 6.50  | putative acyl-CoA dehydrogenase                             |     |
| <i>ydjH</i>                             | <i>b1772</i> | 2.64  | 12.13 | putative kinase                                             |     |

|                         |              |       |       |                                                                     |
|-------------------------|--------------|-------|-------|---------------------------------------------------------------------|
| <i>yodA</i>             | <i>b1973</i> | 2.64  | 3.25  | cadmium-induced metal binding protein                               |
| <i>yeeL_2</i>           | <i>b1979</i> | 2.64  | 2.83  | putative transport protein                                          |
| <i>yohM</i>             | <i>b2106</i> | 3.73  | 10.56 | hypothetical protein                                                |
| <i>yejE</i>             | <i>b2179</i> | 3.73  | 6.96  | putative oligopeptide transport protein                             |
| <i>yejF</i>             | <i>b2180</i> | 2.83  | 2.30  | putative ATP-binding component of a transport system                |
| <i>yfaV</i>             | <i>b2246</i> | 3.48  | 12.13 | putative transport protein                                          |
| <i>yfbJ</i>             | <i>b2258</i> | 2.14  | 8.57  | putative transport, receptor protein                                |
| <i>yfbL</i>             | <i>b2271</i> | 2.30  | 3.48  | putative aminopeptidase                                             |
| <i>perM</i>             | <i>b2493</i> | 2.64  | 6.96  | putative permease                                                   |
| <i>yfgH</i>             | <i>b2505</i> | 2.14  | 8.57  | putative outer membrane lipoprotein                                 |
| <i>ygbD</i>             | <i>b2711</i> | 2.64  | 7.46  | NADH:flavorubredoxin (FIRd) oxidoreductase                          |
| <i>ygcW</i>             | <i>b2774</i> | 2.14  | 2.46  | putative deoxygluconate dehydrogenase, oxidoreductase               |
| <i>hybF</i>             | <i>b2991</i> | 3.73  | 5.28  | protein involved with the maturation of hydrogenases 1 and 2        |
| <i>ygiU</i>             | <i>b3022</i> | 5.66  | 3.25  | putative cyanide hydratase                                          |
| <i>yqiJ</i>             | <i>b3050</i> | 3.03  | 2.83  | putative oxidoreductase                                             |
| <i>ygiI</i>             | <i>b3078</i> | 2.46  | 11.31 | putative oxidoreductase, APC transporter                            |
| <i>yhbM</i>             | <i>b3163</i> | -2.30 | -2.83 | lipoprotein believed to be involved in cell division                |
| <i>yheF</i>             | <i>b3325</i> | 2.83  | 3.03  | putative export protein D for general secretion pathway (GSP)       |
| <i>pshM</i>             | <i>b3334</i> | 2.30  | 3.03  | putative export protein M for general secretion pathway (GSP)       |
| <i>yrfF</i>             | <i>b3398</i> | 2.30  | 2.30  | putative dehydrogenase                                              |
| <i>yidK</i>             | <i>b3679</i> | 2.30  | 4.29  | putative cotransporter                                              |
| <i>yihP</i>             | <i>b3877</i> | 6.06  | 6.06  | putative permease, GPH transporter                                  |
| <i>yihR</i>             | <i>b3879</i> | 9.85  | 6.50  | putative aldose-1-epimerase                                         |
| <i>arp</i>              | <i>b4017</i> | 3.03  | 2.30  | regulator of acetyl CoA synthetase, ankyrin-like regulatory protein |
| <i>dcuB</i>             | <i>b4123</i> | 6.50  | 3.25  | anaerobic C4-dicarboxylate transport protein (Dcu family)           |
| <i>yjgN</i>             | <i>b4257</i> | 2.83  | 2.46  | putative membrane protein possible involved in transport            |
| <i>ygfQ</i>             | <i>b4464</i> | 2.30  | 3.25  | putative membrane protein                                           |
| <b>Function unknown</b> |              |       |       |                                                                     |
| <i>yadS</i>             | <i>b0157</i> | 3.73  | 2.64  | putative membrane protein                                           |
| <i>yafQ</i>             | <i>b0225</i> | 2.83  | 4.00  | conserved hypothetical protein                                      |
| <i>yagZ</i>             | <i>b0293</i> | 2.83  | 2.83  | conserved hypothetical protein                                      |
| <i>b0309</i>            | <i>b0309</i> | 3.48  | 4.59  | hypothetical protein                                                |
| <i>yahC</i>             | <i>b0317</i> | 2.64  | 8.00  | putative membrane protein                                           |
| <i>yaiS</i>             | <i>b0364</i> | 5.66  | 6.06  | conserved hypothetical protein                                      |
| <i>b0370</i>            | <i>b0370</i> | 3.03  | 19.70 | hypothetical protein                                                |
| <i>ylaC</i>             | <i>b0458</i> | 2.64  | 4.00  | putative membrane protein                                           |
| <i>ybaJ</i>             | <i>b0461</i> | 5.66  | 4.29  | conserved hypothetical protein                                      |
| <i>ybbC</i>             | <i>b0498</i> | 2.46  | 4.29  | hypothetical protein                                                |
| <i>ylbE</i>             | <i>b0519</i> | 5.66  | 4.59  | conserved hypothetical protein                                      |
| <i>crcA</i>             | <i>b0622</i> | 3.48  | 4.59  | hypothetical protein, PagP monomer                                  |

(3)

(6)

|               |              |        |        |                                                                            |     |
|---------------|--------------|--------|--------|----------------------------------------------------------------------------|-----|
| <i>ybfG</i>   | <i>b0690</i> | 5.28   | 5.66   | conserved hypothetical protein                                             |     |
| <i>ybfD</i>   | <i>b0706</i> | 2.14   | 4.00   | conserved hypothetical protein                                             |     |
| <i>b0725</i>  | <i>b0725</i> | -3.73  | -2.64  | hypothetical protein                                                       |     |
| <i>yliH</i>   | <i>b0836</i> | -2.14  | -4.59  | putative receptor, induced in stationary phase                             | (4) |
| <i>ycdF</i>   | <i>b1005</i> | -2.30  | -5.28  | hypothetical protein                                                       |     |
| <i>yceP</i>   | <i>b1060</i> | -73.52 | -78.79 | conserved hypothetical protein                                             |     |
| <i>ycfR</i>   | <i>b1112</i> | 11.31  | 3.73   | conserved hypothetical protein                                             |     |
| <i>ycfT</i>   | <i>b1115</i> | 3.25   | 16.00  | putative transport protein                                                 |     |
| <i>ymfA</i>   | <i>b1122</i> | 2.83   | 5.28   | conserved hypothetical protein                                             |     |
| <i>yehP</i>   | <i>b1220</i> | 2.83   | 6.50   | conserved protein, invasin-like, putative factor                           |     |
| <i>ynbE</i>   | <i>b1382</i> | 3.03   | 2.46   | hypothetical protein                                                       |     |
| <i>b1437</i>  | <i>b1437</i> | 2.64   | 9.85   | hypothetical protein                                                       |     |
| <i>ydcX</i>   | <i>b1445</i> | 2.64   | 2.46   | hypothetical protein                                                       | (3) |
| <i>ydcZ</i>   | <i>b1447</i> | 2.64   | 3.25   | putative transport protein                                                 |     |
| <i>yddJ</i>   | <i>b1470</i> | 2.46   | 3.03   | hypothetical protein                                                       |     |
| <i>yddK</i>   | <i>b1471</i> | 3.03   | 4.00   | putative glycoprotein                                                      |     |
| <i>b1500</i>  | <i>b1500</i> | 2.83   | 2.14   | hypothetical protein, gene is in an operon associated with acid resistance |     |
| <i>yneK</i>   | <i>b1527</i> | 2.83   | 4.00   | conserved hypothetical protein                                             |     |
| <i>ydhl</i>   | <i>b1643</i> | 2.30   | 3.25   | hypothetical protein                                                       |     |
| <i>arpB_1</i> | <i>b1720</i> | 2.30   | 8.57   | hypothetical protein                                                       |     |
| <i>arpB_2</i> | <i>b1721</i> | 2.46   | 2.64   | hypothetical protein                                                       |     |
| <i>ydjC</i>   | <i>b1733</i> | 2.30   | 3.48   | hypothetical protein, encoded by an operon required for growth on N,N      |     |
| <i>ynjI</i>   | <i>b1762</i> | 3.73   | 3.03   | conserved hypothetical protein                                             |     |
| <i>b1788</i>  | <i>b1788</i> | 2.30   | 9.85   | hypothetical protein                                                       |     |
| <i>yoaG</i>   | <i>b1796</i> | 3.03   | 9.85   | hypothetical protein                                                       |     |
| <i>yobD</i>   | <i>b1820</i> | 2.30   | 2.14   | conserved hypothetical protein                                             |     |
| <i>mgrB</i>   | <i>b1826</i> | 2.30   | 12.13  | hypothetical protein, product of a gene induced by low magnesium           |     |
| <i>yebV</i>   | <i>b1836</i> | -4.59  | -2.30  | hypothetical protein                                                       |     |
| <i>yecT</i>   | <i>b1877</i> | 3.73   | 13.00  | hypothetical protein                                                       |     |
| <i>yecR</i>   | <i>b1904</i> | 2.30   | 2.64   | conserved hypothetical protein                                             |     |
| <i>yedN</i>   | <i>b1934</i> | 3.73   | 6.50   | conserved hypothetical protein                                             |     |
| <i>yedM</i>   | <i>b1935</i> | 2.14   | 3.48   | hypothetical protein                                                       |     |
| <i>yeeN</i>   | <i>b1983</i> | 2.83   | 5.28   | conserved hypothetical protein                                             |     |
| <i>sanA</i>   | <i>b2144</i> | 2.30   | 2.14   | vancomycin sensitivity                                                     |     |
| <i>yejG</i>   | <i>b2181</i> | 9.85   | 4.00   | conserved hypothetical protein                                             |     |
| <i>yfaA</i>   | <i>b2230</i> | 2.64   | 2.64   | conserved hypothetical protein                                             |     |
| <i>ais</i>    | <i>b2252</i> | 2.46   | 3.25   | protein induced by aluminum                                                |     |
| <i>yfbM</i>   | <i>b2272</i> | 2.30   | 12.13  | conserved hypothetical protein                                             |     |
| <i>yfbO</i>   | <i>b2274</i> | 2.30   | 5.28   | hypothetical protein                                                       |     |
| <i>yfdF</i>   | <i>b2345</i> | 2.46   | 3.03   | hypothetical protein                                                       |     |

|              |              |       |       |                                                                  |     |
|--------------|--------------|-------|-------|------------------------------------------------------------------|-----|
| <i>yfeS</i>  | <i>b2420</i> | 2.30  | 3.03  | conserved hypothetical protein                                   |     |
| <i>yfgF</i>  | <i>b2503</i> | 2.14  | 4.29  | putative cytochrome C-type biogenesis protein, oxidative protein |     |
| <i>yfiP</i>  | <i>b2583</i> | 2.14  | 2.14  | conserved hypothetical protein                                   |     |
| <i>b2596</i> | <i>b2596</i> | 2.83  | 2.14  | hypothetical protein                                             |     |
| <i>b2651</i> | <i>b2651</i> | 2.46  | 4.92  | hypothetical protein                                             |     |
| <i>ygaU</i>  | <i>b2665</i> | -2.14 | -2.14 | conserved hypothetical protein                                   | (4) |
| <i>ygcJ</i>  | <i>b2758</i> | 2.14  | 9.85  | conserved hypothetical protein                                   |     |
| <i>ygeF</i>  | <i>b2850</i> | 2.14  | 4.29  | conserved hypothetical protein                                   | (3) |
| <i>ygeO</i>  | <i>b2859</i> | 2.14  | 2.64  | conserved hypothetical protein                                   | (3) |
| <i>yqgC</i>  | <i>b2940</i> | 2.30  | 2.30  | hypothetical protein                                             |     |
| <i>yqgD</i>  | <i>b2941</i> | 2.83  | 18.38 | hypothetical protein                                             | (6) |
| <i>yghG</i>  | <i>b2971</i> | 14.93 | 11.31 | hypothetical protein                                             |     |
| <i>yhaI</i>  | <i>b3104</i> | 2.30  | 3.25  | putative cytochrome                                              |     |
| <i>yhaB</i>  | <i>b3120</i> | 3.03  | 2.46  | conserved hypothetical protein                                   |     |
| <i>yhaC</i>  | <i>b3121</i> | 2.46  | 6.50  | conserved hypothetical protein                                   |     |
| <i>yhcR</i>  | <i>b3242</i> | 21.11 | 12.13 | hypothetical protein                                             |     |
| <i>yhfL</i>  | <i>b3369</i> | 2.14  | 3.73  | hypothetical protein                                             |     |
| <i>yrhA</i>  | <i>b3443</i> | 2.46  | 3.48  | conserved hypothetical protein                                   |     |
| <i>yhhH</i>  | <i>b3483</i> | 4.92  | 5.66  | hypothetical protein                                             |     |
| <i>yhhI</i>  | <i>b3484</i> | 5.66  | 4.29  | conserved protein, similar to H-repeat-associated proteins       |     |
| <i>yhiS</i>  | <i>b3504</i> | 2.64  | 2.46  | conserved hypothetical protein                                   |     |
| <i>viaH</i>  | <i>b3561</i> | 2.46  | 9.19  | putative membrane protein                                        |     |
| <i>viaA</i>  | <i>b3562</i> | 3.25  | 4.00  | hypothetical protein                                             |     |
| <i>viaB</i>  | <i>b3563</i> | 4.29  | 29.86 | inner membrane protein                                           |     |
| <i>yibJ</i>  | <i>b3595</i> | 2.30  | 19.70 | hypothetical protein                                             |     |
| <i>yibG</i>  | <i>b3596</i> | 2.83  | 8.00  | conserved hypothetical protein                                   |     |
| <i>yicG</i>  | <i>b3646</i> | 2.83  | 4.29  | putative membrane protein                                        |     |
| <i>yieI</i>  | <i>b3716</i> | 2.30  | 3.48  | putative membrane protein                                        |     |
| <i>b3808</i> | <i>b3808</i> | 2.64  | 9.19  | hypothetical protein                                             |     |
| <i>yigF</i>  | <i>b3817</i> | 2.30  | 10.56 | conserved hypothetical protein                                   |     |
| <i>yigG</i>  | <i>b3818</i> | 3.25  | 6.06  | inner membrane protein                                           |     |
| <i>yiiL</i>  | <i>b3901</i> | 2.30  | 2.30  | conserved hypothetical protein                                   |     |
| <i>yjaA</i>  | <i>b4011</i> | 2.83  | 3.73  | conserved hypothetical protein                                   |     |
| <i>yjbL</i>  | <i>b4047</i> | 5.66  | 55.72 | hypothetical protein                                             |     |
| <i>yjcF</i>  | <i>b4066</i> | 3.25  | 8.00  | conserved hypothetical protein                                   |     |
| <i>yjdK</i>  | <i>b4128</i> | 2.14  | 4.29  | hypothetical protein                                             |     |
| <i>yjeJ</i>  | <i>b4145</i> | 2.64  | 2.64  | conserved hypothetical protein                                   |     |
| <i>yjfM</i>  | <i>b4185</i> | 3.48  | 9.85  | conserved hypothetical protein                                   |     |
| <i>yjfZ</i>  | <i>b4204</i> | 2.46  | 9.19  | hypothetical protein                                             |     |
| <i>yjgG</i>  | <i>b4247</i> | 2.46  | 8.57  | hypothetical protein                                             |     |

|                       |              |      |       |                                                               |
|-----------------------|--------------|------|-------|---------------------------------------------------------------|
| <i>yjgL</i>           | <i>b4253</i> | 2.14 | 5.28  | conserved hypothetical protein                                |
| <i>yjhA</i>           | <i>b4311</i> | 2.30 | 9.19  | conserved hypothetical protein                                |
| <i>ygaR</i>           | <i>b4462</i> | 2.30 | 34.30 | hypothetical protein                                          |
| <b>Not classified</b> |              |      |       |                                                               |
| <i>citE</i>           | <i>b0616</i> | 3.25 | 3.25  | citrate lyase beta chain (acyl lyase subunit)                 |
| <i>ycfZ</i>           | <i>b1121</i> | 3.03 | 21.11 | homolog of virulence factor                                   |
| <i>yiaN</i>           | <i>b3578</i> | 2.46 | 18.38 | YiaMNO Binding Protein-dependent Secondary (TRAP) Transporter |

## References

1. **Beca-DeLancey, R. R., M. M. T. South, X. Ding, and P. N. Rather.** 1999. *Escherichia coli* genes regulated by cell-to-cell signaling. Proc. Natl. Acad. Sci. USA **96**:4610-4614.
2. **DeLisa, M. P., J. J. Valdes, and W. E. Bentley.** 2001. Mapping Stress-Induced Changes in Autoinducer AI-2 Production in Chemostat-Cultivated *Escherichia coli* K-12. J. Biotechnol. **183**:2918-2928.
3. **DeLisa, M. P., C.-F. Wu, L. Wang, J. J. Valdes, and W. E. Bentley.** 2001. DNA Microarray-Based Identification of Genes Controlled by Autoinducer 2-Stimulated Quorum Sensing in *Escherichia coli*. J. Bacteriol. **183**:5239-5247.
4. **Patten, C. L., M. G. Kirchhof, M. R. Schertzberg, R. A. Morton, and H. E. Schellhorn.** 2004. Microarray analysis of RpoS-mediated gene expression in *Escherichia coli* K-12. Mol. Gen. Genomics **272**:580-591.
5. **Ren, D., L. A. Bedzyk, R. W. Ye, S. M. Thomas, and T. K. Wood.** 2004. Differential Gene Expression Shows Natural Brominated Furanones Interfere with the Autoinducer-2 Bacterial Signaling System of *Escherichia coli*. Biotechnol. Bioeng. **88**:630-642.
6. **Ren, D., L. A. Bedzyk, R. W. Ye, S. M. Thomas, and T. K. Wood.** 2004. Stationary-Phase Quorum-Sensing Signals Affect Autoinducer-2 and Gene Expression in *Escherichia coli*. Appl. Environ. Microbiol. **70**:2038-2043.
7. **Sperandio, V., A. G. Torres, J. A. Giron, and J. B. Kaper.** 2001. Quorum Sensing Is a Global Regulatory Mechanism in Enterohemorrhagic *Escherichia coli* O157:H7. J. Bacteriol. **183**:5187-5197.
8. **Wang, D., X. Ding, and P. N. Rather.** 2001. Indole Can Act as an Extracellular Signal in *Escherichia coli*. J. Bacteriol. **183**:4210-4216.
9. **Xavier, K. B., and B. L. Bassler.** 2005. Regulation of Uptake and Processing of the Quorum-Sensing Autoinducer AI-2 in *Escherichia coli*. J. Bacteriol. **187**:238-248.
